# Supplementary material for: Stable and active methanol oxidation via anchored PtRu alloy nanoparticles on NiFe layered double hydroxides
Source: Royal Society of Chemistry journal article supplement (doi:10.1039/d3gc03894g), 2024-01-01
Supplement: d3gc03894g1.pdf [file d3gc03894g1.pdf]

## Supplementary information

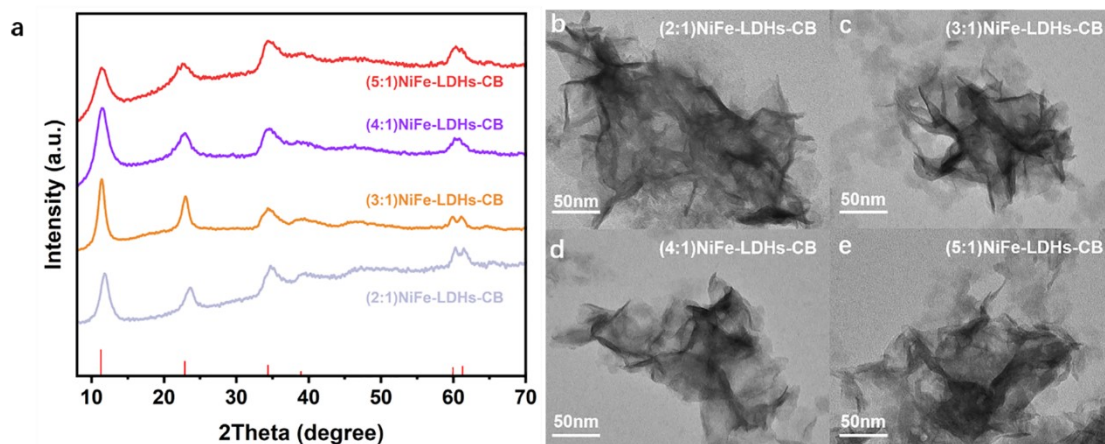

**Figure S1.** The crystallinity and morphology of NiFe-LDHs-CB. (a) XRD patterns and (b) morphology of the NiFe-LDHs-CB at different Ni: Fe ratios.

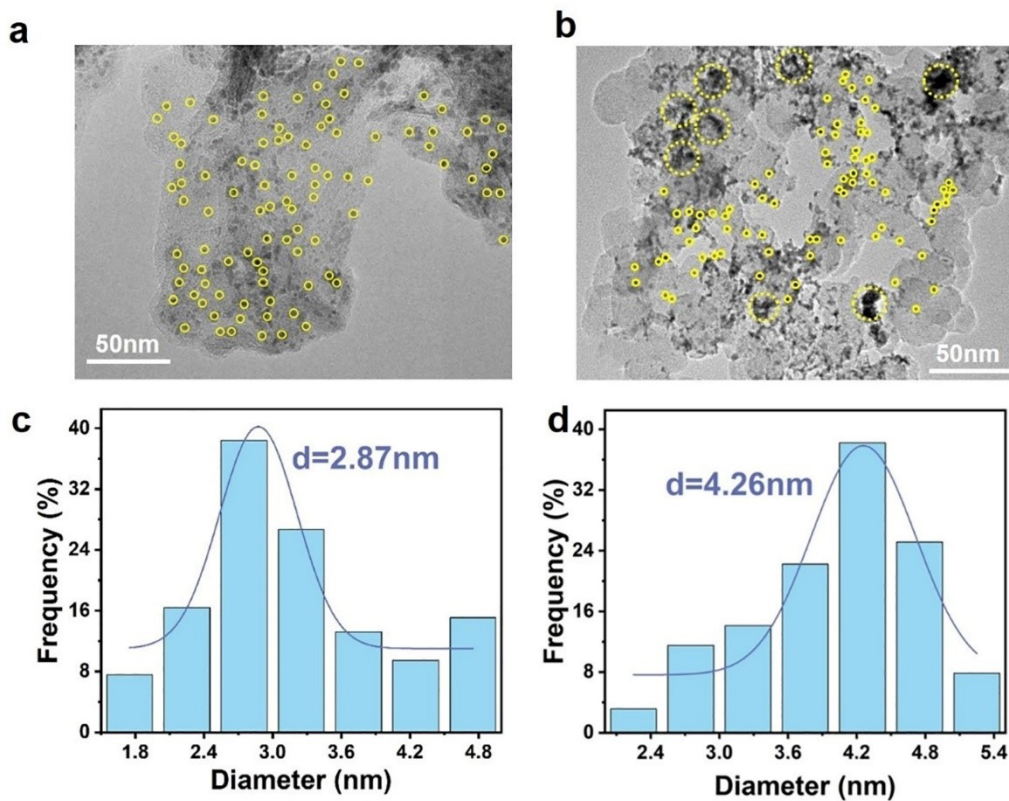

**Figure S2.** TEM images of (a) PtRu/NiFe-LDHs-CB and (b) commercial PtRu/C catalyst. Size distribution histograms of (c) PtRu/NiFe-LDHs-CB and (d) commercial PtRu/C catalyst.

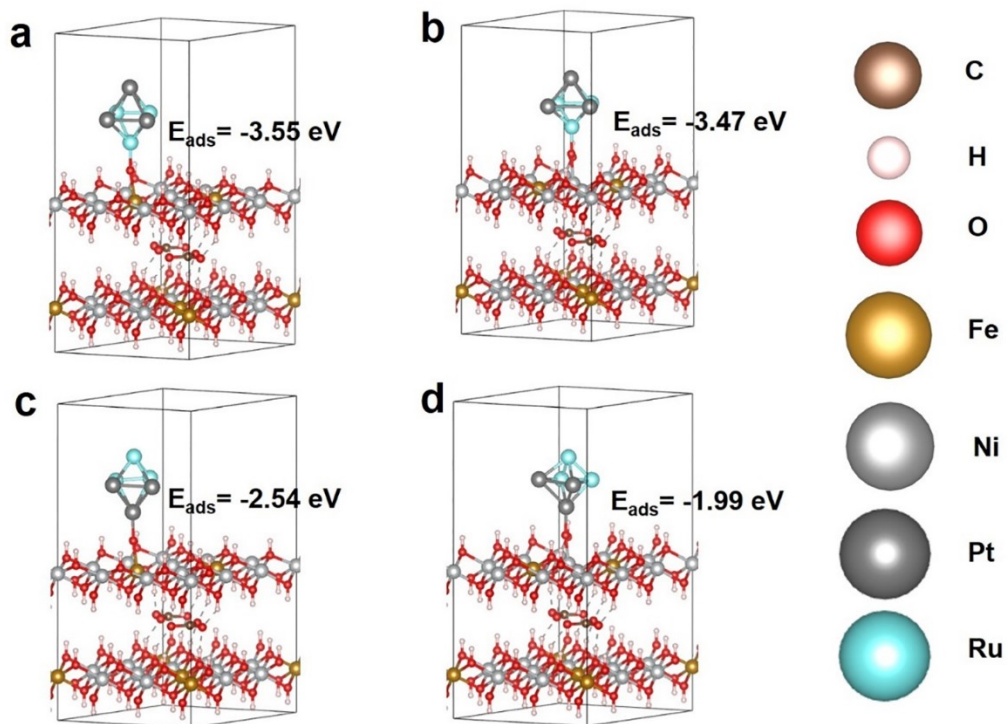

**Figure S3.** Comparison of adsorption energies of Ru on (a) Fe sites and (b) Ni sites; Pt on (c) Fe sites and (d) Ni sites.

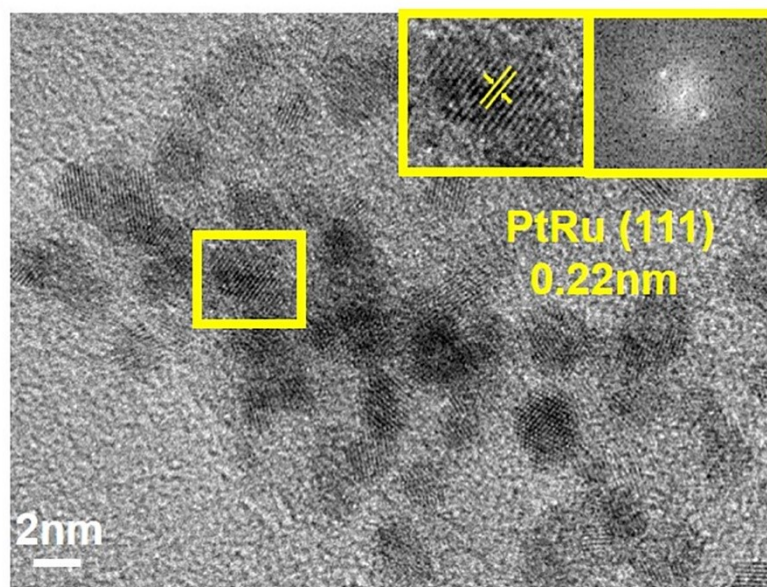

**Figure S4.** HRTEM images of commercial PtRu/C.

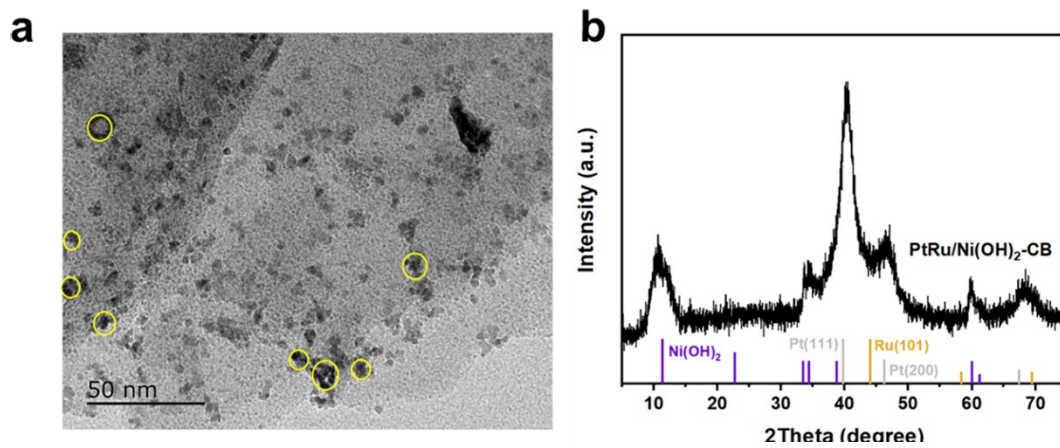

**Figure S5.** (a) TEM image and (b)XRD pattern of PtRu/Ni(OH)<sub>2</sub>-CB catalyst.

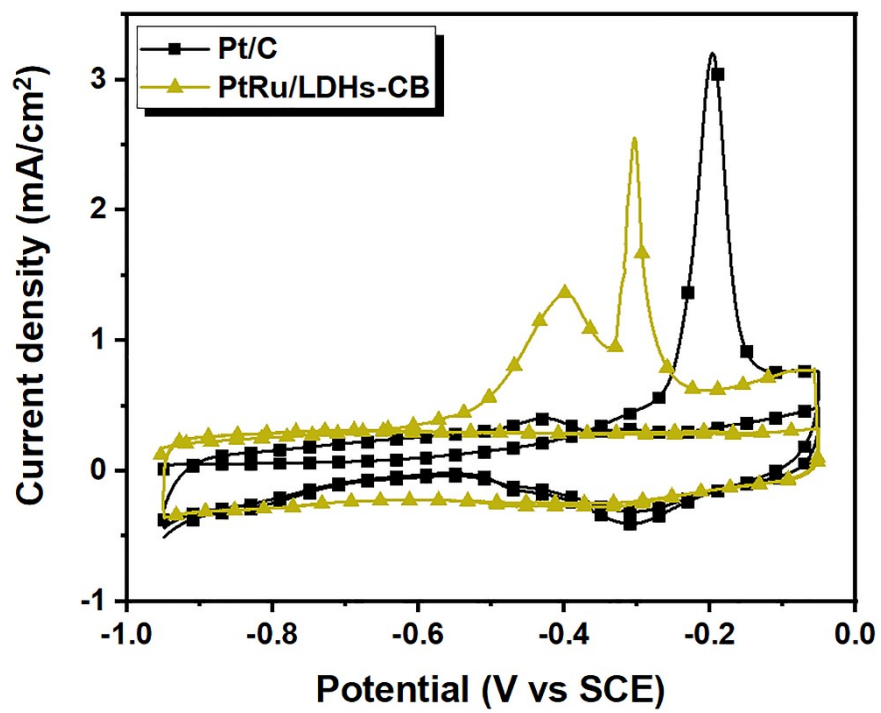

**Figure S6.** CO stripping of Pt/C and PtRu/NiFe-LDHs-CB.

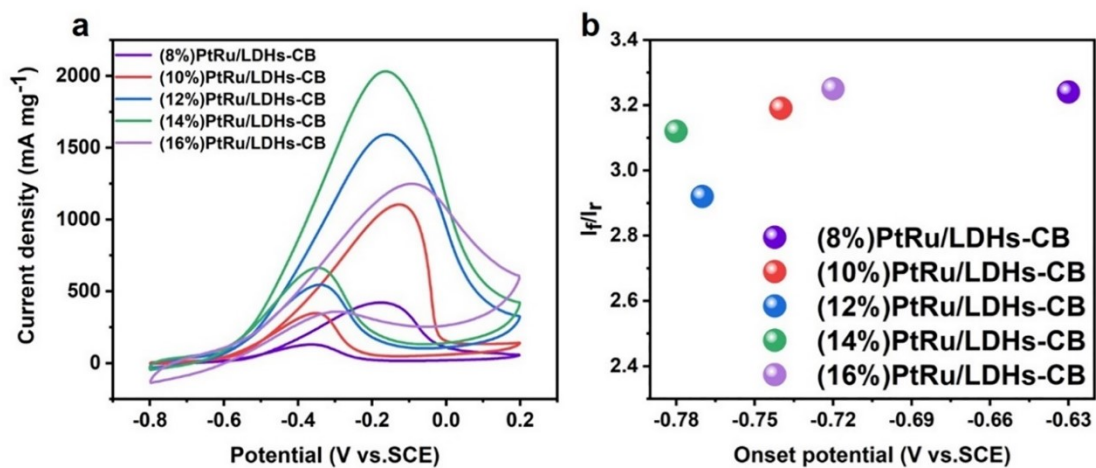

**Figure S7.** MOR performance summary of PtRu/NiFe-LDHs-CB with different PtRu alloy loadings.

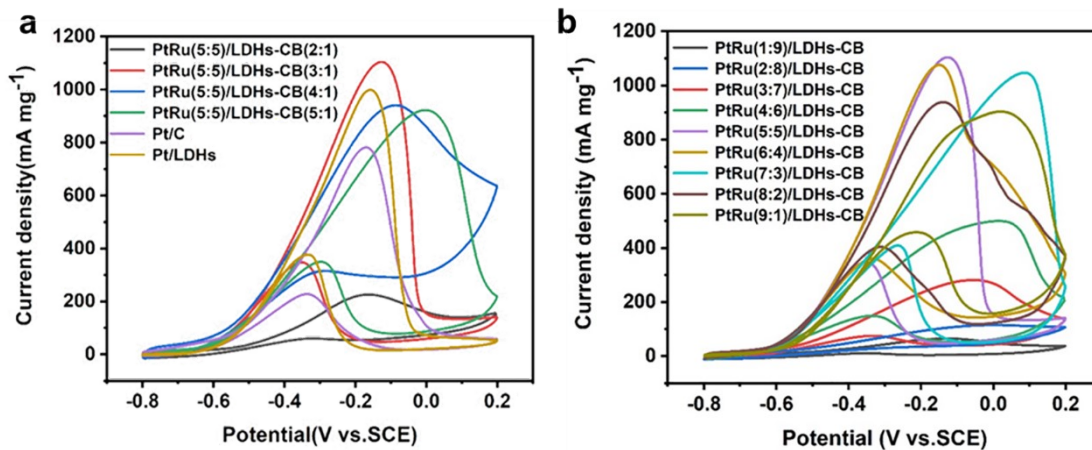

**Figure S8.** MOR performance summary of PtRu/NiFe-LDHs-CB with different (a) Ni: Fe ratios and (b) Pt: Ru ratios.



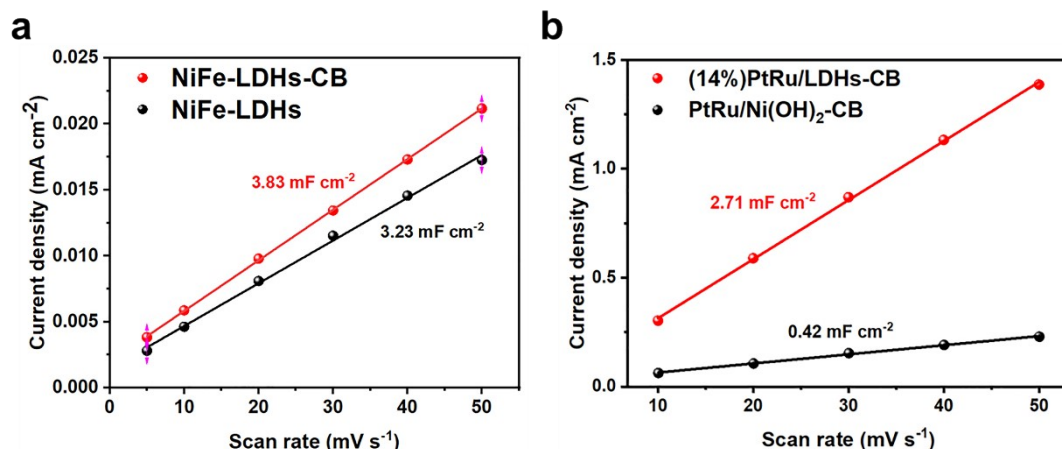

**Figure S9.** Change of current density plotted against the scan rate.

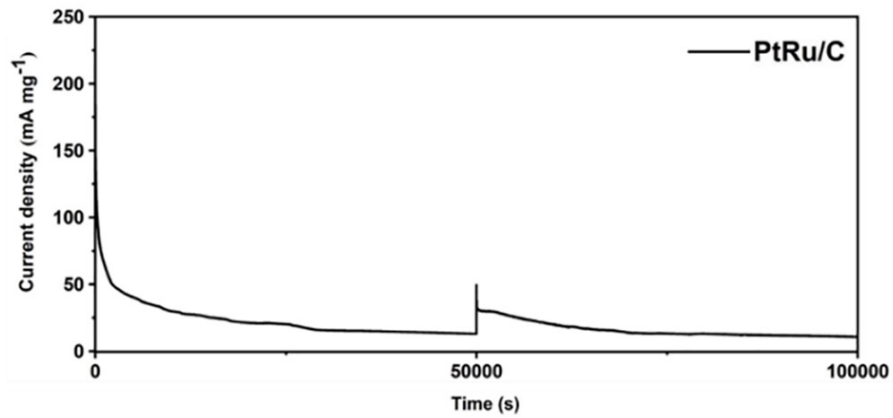

**Figure S10.** Long-term durability measurements of standard PtRu/C. The reaction medium was renewed every 50,000s electrocatalysis process.

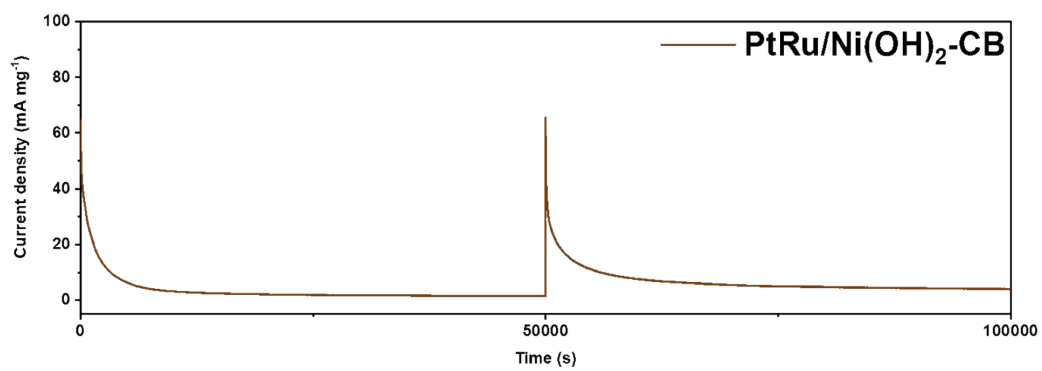

**Figure S11.** Long-term durability measurements of PtRu/Ni(OH)<sub>2</sub>-CB. The reaction medium was renewed every 50,000s electrocatalysis process.

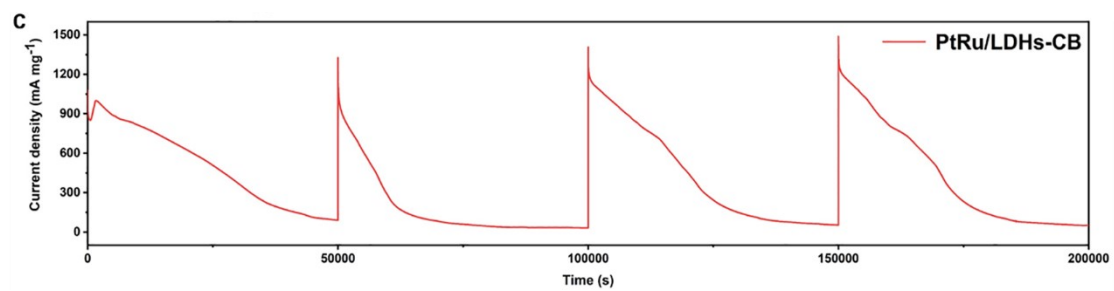

**Figure S12.** Long-term durability measurements of PtRu/NiFe-LDHs-CB. The reaction medium was renewed every 50,000s electrocatalysis process.

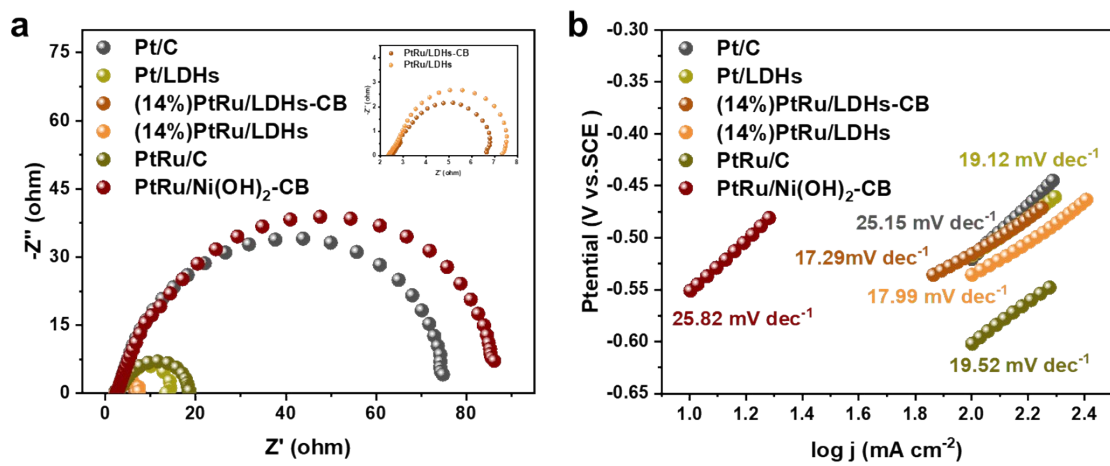

**Figure S13.** EIS spectrogram (a) and Tafel slopes (b) of Pt/C, Pt/LDHs, PtRu/C, PtRu/Ni(OH)<sub>2</sub>-CB and PtRu/NiFe-LDHs-CB for MOR in 1.0 M CH<sub>3</sub>OH and 1.0 M KOH solution.

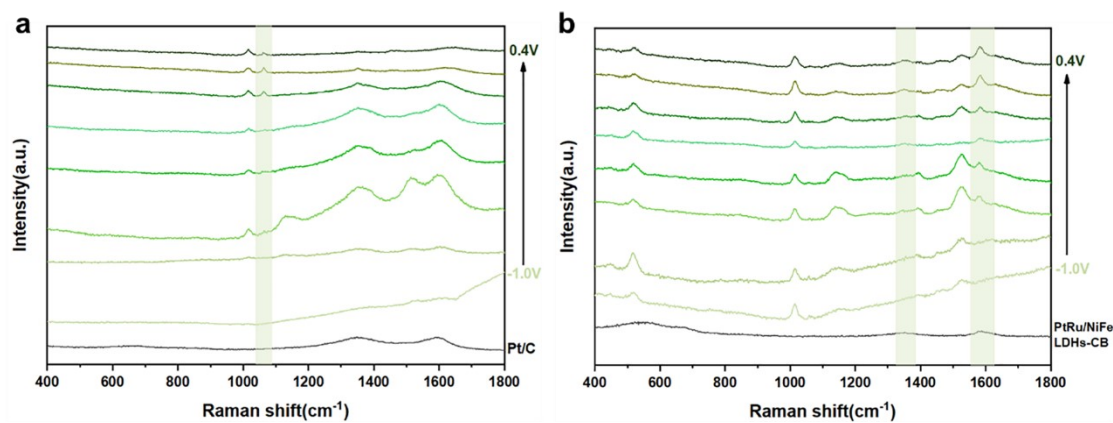

**Figure S14.** In situ Raman spectra of (a) Pt/C and (b) PtRu/NiFe-LDHs-CB for MOR from -1.0 V to 0.4 V (vs. Ag/AgCl) in 1.0 M CH<sub>3</sub>OH and 1.0 M KOH solution.

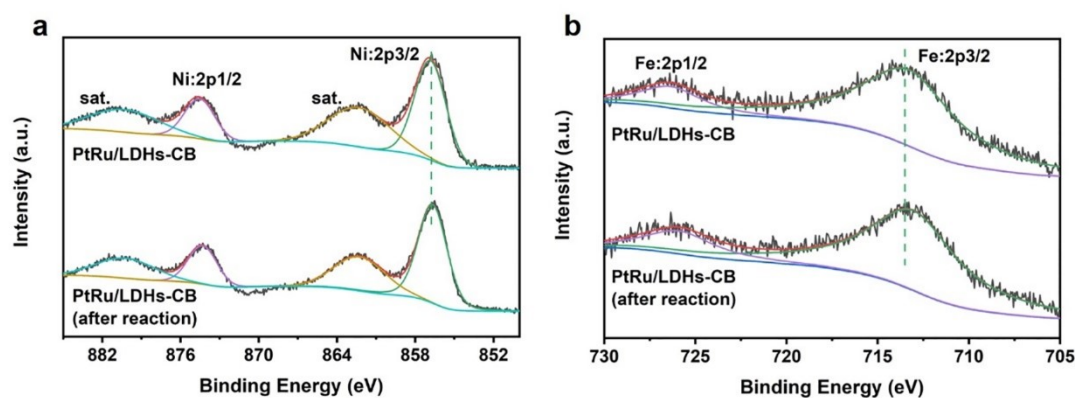

**Figure S15.** (a) Ni 2p and (b) Fe 2p XPS spectra of PtRu/NiFe-LDHs-CB before and after the 100,000 s chronoamperometric measurement towards MOR.

Table S1. OH adsorption energies for possible adsorption cases on NiFe-LDHs

| <b>Samples</b> | <b>Adsorption Energy (eV)</b> |                    |
|----------------|-------------------------------|--------------------|
|                | <b>Ni: Fe=2: 1</b>            | <b>Ni: Fe=3: 1</b> |
| Ni             | 1.7386                        | 1.1094             |
| Fe             | 1.0707                        | 0.9869             |



Table S2. Activity and stability comparison of different MOR catalysts

| Catalysts                          | Methanol concentration | Mass activity (mA/mg <sub>(Pt/Pd)</sub> ) | Activity retention value | Ref.                                      |
|------------------------------------|------------------------|-------------------------------------------|--------------------------|-------------------------------------------|
| PtRu/LDHs-CB                       | 1 M CH <sub>3</sub> OH | 2031                                      | 0.8 V/3600 s/61.54%      | This work                                 |
| Au/PtCu                            | 1 M CH <sub>3</sub> OH | 1500                                      | 0.65 V/2000 s/13.34%     | Small, 2014, 10, 3262-3265                |
| Pt/Ni(OH) <sub>2</sub> /rGo        | 1 M CH <sub>3</sub> OH | 1070                                      | 0.7 V/3600 s/90%         | Nat. Commun., 2015, 6, 10035              |
| Pt <sub>1</sub> -NiO <sub>1</sub>  | 1 M CH <sub>3</sub> OH | 880                                       | 0.74 V/3600 s/24%        | Appl. Surf. Sci., 2017, 411, 379-385      |
| Pt-Bi/GNs                          | 1 M CH <sub>3</sub> OH | 2005                                      | 0.85 V/2000 s/45%        | Electrochim. Acta, 2018, 264, 53-60       |
| Pt/GNs                             | 1 M CH <sub>3</sub> OH | 504                                       | 0.85 V/2000 s/20%        | Electrochim. Acta, 2018, 264, 53-60       |
| Pt/NiFe-LDH/rGO                    | 1 M CH <sub>3</sub> OH | 949.3                                     | 0.7 V/1000 s/31.6%       | J. Electroanal. Chem., 2018, 818, 198-203 |
| Pt-CoOOH-CD/C-30%                  | 1 M CH <sub>3</sub> OH | 645                                       | 0.7 V/10000 s/42.7%      | Mater. Chem. Phys., 2019, 225, 64-71      |
| Pt-CoOOH-CD/C-45%                  | 1 M CH <sub>3</sub> OH | 856                                       | 0.7 V/10000 s/65.24%     | Mater. Chem. Phys., 2019, 225, 64-71      |
| Pt-Ni nanooctahedra/C              | 1 M CH <sub>3</sub> OH | 1000                                      | 0.8 V/1000 s/23.8%       | Chem. Eur. J., 2019, 25, 7185-7190        |
| Pt-Ni@PANI-1                       | 1 M CH <sub>3</sub> OH | 2500                                      | 0.8 V/1000 s/17.47%      | Chem. Eur. J., 2019, 25, 7185-7190        |
| Pt-Ce(CO <sub>3</sub> )OH/rGO-1    | 1 M CH <sub>3</sub> OH | 1277.5                                    | 0.68 V/3600 s/20.83%     | J. Mater. Chem. A, 2019, 7, 6562-6571     |
| Pt-Ce(CO <sub>3</sub> )OH/rGO-2    | 1 M CH <sub>3</sub> OH | 1477.5                                    | 0.68 V/3600 s/66%        | J. Mater. Chem. A, 2019, 7, 6562-6571     |
| Pt-Ce(CO <sub>3</sub> )OH/rGO-3    | 1 M CH <sub>3</sub> OH | 1273.7                                    | 0.68 V/3600 s/30.77%     | J. Mater. Chem. A, 2019, 7, 6562-6571     |
| IL-Pd <sub>3</sub> Cu <sub>1</sub> | 1 M CH <sub>3</sub> OH | 2960                                      | 0.75 V/3600 s/11.12%     | Mater. Horiz., 2020, 7, 2407-2413         |
| Pd-PdO PNTs-260                    | 1 M CH <sub>3</sub> OH | 1113                                      | 0.7 V/10000 s/28.5%      | Adv. Funct. Mater., 2020, 30, 2000534     |
| S-RGO-Pt                           | 1 M CH <sub>3</sub> OH | 644                                       | 0.75 V/3600 s/2.25%      | Mater. Today Energy, 2021, 19, 100588     |
| N-C/Pt                             | 3 M CH <sub>3</sub> OH | 1800                                      | 0.8 V/4000 s/30%         | Small, 2022, 18, 2107067                  |

|               |                        |      |                     |                                                |
|---------------|------------------------|------|---------------------|------------------------------------------------|
| Co-N-C/Pt     | 3 M CH <sub>3</sub> OH | 5600 | 0.8 V/4000 s/60%    | Small, 2022, 18, 2107067                       |
| Pd-UNs/Cl-GDY | 1 M CH <sub>3</sub> OH | 3600 | 0.97 V/12000 s/6.7% | Angew. Chem. Int. Ed., 2023, 62,<br>e202308968 |
| Pt-Co@NC-850  | 0.5 M EtOH             | 5390 | 0.836 V/7200 s/36%  | Chem. Eng. J, 2023, 473, 145028                |

Table S3. Power density comparison of different anode catalysts in DMFCs

| Catalysts                                  | Methanol concentration | Metal loading            | Power density            | Ref.                                                  |
|--------------------------------------------|------------------------|--------------------------|--------------------------|-------------------------------------------------------|
| PtRu/LDHs-CB                               | 3M CH <sub>3</sub> OH  | 1.4 mg cm <sup>-2</sup>  | 157 mW cm <sup>-2</sup>  | This work                                             |
| PtRu/C                                     | 3M CH <sub>3</sub> OH  | 1.4 mg cm <sup>-2</sup>  | 68 mW cm <sup>-2</sup>   | This work                                             |
| PtRu/PC-H                                  | 3M CH <sub>3</sub> OH  | 1 mg cm <sup>-2</sup>    | 83.7 mW cm <sup>-2</sup> | Appl. Catal. B Environ. 263 (2020) 118345             |
| PtRu/PC-L                                  | 3M CH <sub>3</sub> OH  | 1 mg cm <sup>-2</sup>    | 46.5 mW cm <sup>-2</sup> | Appl. Catal. B Environ. 263 (2020) 118345             |
| PtRu/C/Nafion/PVA                          | 4M CH <sub>3</sub> OH  | 2 mg cm <sup>-2</sup>    | 44 mW cm <sup>-2</sup>   | J. Power Sources. 255 (2014) 70-75                    |
| PtRu/Porous MPL                            | 3M CH <sub>3</sub> OH  | 2 mg cm <sup>-2</sup>    | 43.7 mW cm <sup>-2</sup> | J. Power Sources. 262 (2014) 213-218                  |
| PtRu/C+20% IrO <sub>2</sub>                | 2M CH <sub>3</sub> OH  | 0.82 mg cm <sup>-2</sup> | 23 mW cm <sup>-2</sup>   | Electrochim. Acta 128 (2014) 304-310                  |
| PtRuMo/CNTs                                | 3M CH <sub>3</sub> OH  | 2 mg cm <sup>-2</sup>    | 61.3 mW cm <sup>-2</sup> | Int. J. Hydrogen Energy 2010, 35 (2010):<br>8225-8233 |
| PdFe/C                                     | 5M CH <sub>3</sub> OH  | 1 mg cm <sup>-2</sup>    | 42 mW cm <sup>-2</sup>   | Materials 10 (2017): 580-586                          |
| Pd/C-E TEK                                 | 5M CH <sub>3</sub> OH  | 1 mg cm <sup>-2</sup>    | 26 mW cm <sup>-2</sup>   | Materials 10 (2017): 580-586                          |
| Pt <sub>50</sub> Ru <sub>50</sub> /C E-TEK | 2M CH <sub>3</sub> OH  | 1 mg cm <sup>-2</sup>    | 120 mW cm <sup>-2</sup>  | Int. J. Electrochem. Sci. 4 (2009) 954-961            |
| IL/Pd <sub>3</sub> Cu <sub>1</sub>         | 1M CH <sub>3</sub> OH  | 2 mg cm <sup>-2</sup>    | 8 mW cm <sup>-2</sup>    | Mater. Horiz. 2020, 7, 2407-2413                      |
| PtRu/C-JM                                  | 1M CH <sub>3</sub> OH  | 2 mg cm <sup>-2</sup>    | 27.7 mW cm <sup>-2</sup> | J. Mater. Chem. A. 2017, 5, 19857-19865               |
| Pt/pp-CeO <sub>2</sub>                     | 1M CH <sub>3</sub> OH  | 5 mg cm <sup>-2</sup>    | 40 mW cm <sup>-2</sup>   | Int. J. Hydrogen Energy. 2023, 48, 5953-5960          |
| Pt-NiTiO <sub>3</sub> /C                   | 1M CH <sub>3</sub> OH  | 0.5 mg cm <sup>-2</sup>  | 32.8 mW cm <sup>-2</sup> | Mater Lett, 276 (2020) 128222                         |
| PtCu NWs                                   | 1M CH <sub>3</sub> OH  | 0.6 mg cm <sup>-2</sup>  | 49.7 mW cm <sup>-2</sup> | ACS Catal. 2021, 11, 14428-14438                      |
| PtRu/C                                     | 5M CH <sub>3</sub> OH  | 1.5 mg cm <sup>-2</sup>  | 48.2 mW cm <sup>-2</sup> | J. Power Sources. 561 (2023) 232732                   |

---

|                                                             |                       |                          |                           |                                       |
|-------------------------------------------------------------|-----------------------|--------------------------|---------------------------|---------------------------------------|
| Pt/C                                                        | 8M CH <sub>3</sub> OH | 1.67 mg cm <sup>-2</sup> | 117.0 mW cm <sup>-2</sup> | Adv. Mater. 2021, 33, 2103383         |
| NiPt-Mo <sub>2</sub> C@C                                    | 1M CH <sub>3</sub> OH | 5 mg cm <sup>-2</sup>    | 45 mW cm <sup>-2</sup>    | Green Energy Environ 8 (2023) 559–566 |
| Pd <sub>0.60</sub> Bi <sub>0.35</sub> Au <sub>0.05</sub> /C | 3M CH <sub>3</sub> OH | 1.25 mg cm <sup>-2</sup> | 112.4 mW cm <sup>-2</sup> | Nano Res. 2022, 15(7): 6036–6044      |
| Pd <sub>0.62</sub> Bi <sub>0.38</sub> /C                    | 3M CH <sub>3</sub> OH | 1.25 mg cm <sup>-2</sup> | 87.2 mW cm <sup>-2</sup>  | Nano Res. 2022, 15(7): 6036–6044      |

---
